# Supplementary material
Source: PubMed Central journal article supplement (PMC4702613)
Supplement: AEM.02960-15_zam999116837so1.pdf [file AEM.02960-15_zam999116837so1.pdf]

## Supporting Information

**Figure S1.** SACE\_6965 encodes the putative phosphate utilization regulator PhoP in *S. erythraea*. **(a)** Genetic organization of *phoPR* of *S. coelicolor* and its homologous genes of *S. erythraea*. **(b)** Alignment of amino acid sequences of HTH domains of PhoP proteins in some actinomycetes species. **(c)** Phylogenetic analysis of some PhoP proteins.

**Figure S2.** Verification of *phoP*-overexpressed mutant (*phoP<sub>O</sub>*) by PCR and real time quantitative PCR (RT-qPCR). **(a)** PCR of the integrated fragment spanning inserted *phoP* gene region and its downstream plasmid region; **(b)** Transcription analysis of *phoP* in WT and *phoP<sub>O</sub>* by RT-qPCR.

**Figure S3.** The plasmid-alone negative control for transcription analysis and phenotype analysis between WT and *phoP<sub>O</sub>*. **(a)** Transcription analysis of *glnR* and *phoP* in WT and NULL mutant as the plasmid-alone negative control; **(b)** Ery A production in WT and NULL mutant.

**Figure S4.** Comparison of the binding activity between His-PhoP and His-PhoP<sup>DBD</sup>.

**Figure S5.** Cell growth (a) and erythromycin product (b) of *S. erythraea* wild type (WT), *glnR*-deleted mutant ( $\Delta glnR$ ), *glnR* complementary strain (*glnR<sub>C</sub>*), *phoP*-overexpressed strain (*phoP<sub>O</sub>*), and *phoP*-overexpressed  $\Delta glnR$  strain ( $\Delta glnR: phoP<sub>O</sub>$ ). The growth was determined with OD<sub>600</sub>. The erythromycin A was determined by HPLC.

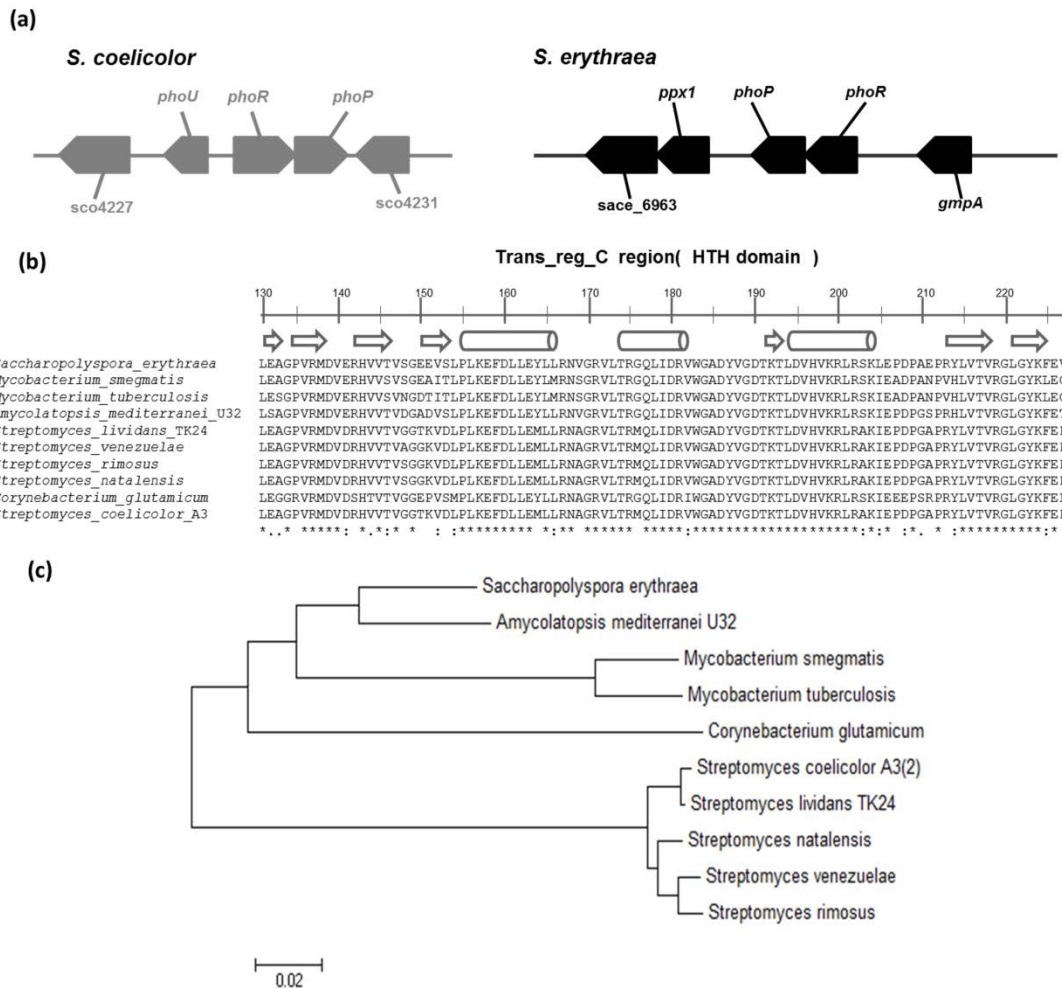

**Figure S1.** SACE\_6965 encodes the putative phosphate utilization regulator PhoP in *S. erythraea*. **(a)** Genetic organization of *phoPR* of *S. coelicolor* and its homologous genes of *S. erythraea*. **(b)** Alignment of amino acid sequences of HTH domains of PhoP proteins in some actinomycetes species. **(c)** Phylogenetic analysis of some PhoP proteins.

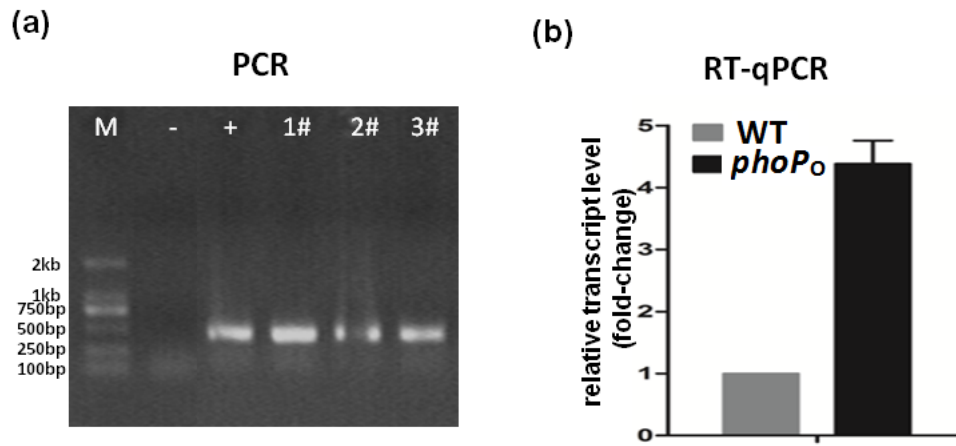

**Figure S2.** Verification of *phoP*-overexpressed mutant (*phoP<sub>o</sub>*) by PCR and real time quantitative PCR (RT-qPCR). **(a)** PCR of the integrated fragment spanning inserted *phoP* gene region and its downstream plasmid region; **(b)** Transcription analysis of *phoP* in WT and *phoP<sub>o</sub>* by RT-qPCR.

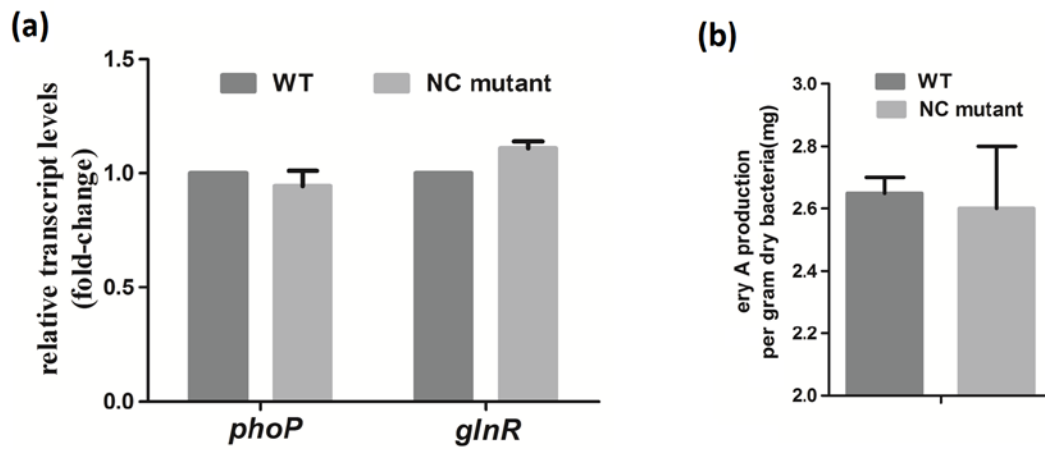

**Figure S3.** The plasmid-alone negative control for transcription analysis and phenotype analysis between WT and *phoP*<sub>0</sub>. **(a)** Transcription analysis of *glnR* and *phoP* in WT and NULL mutant as the plasmid-alone negative control; **(b)** Ery A production in WT and NULL mutant.

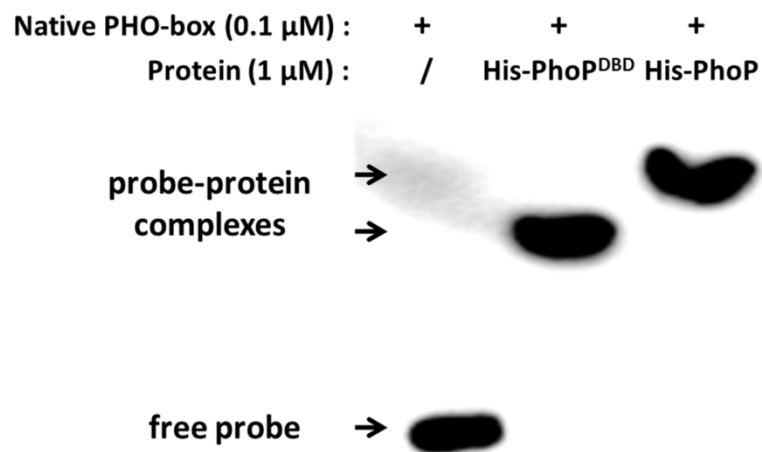

**Figure S4.** Comparison of the binding activity between His-PhoP and His-PhoP<sup>DBD</sup>.

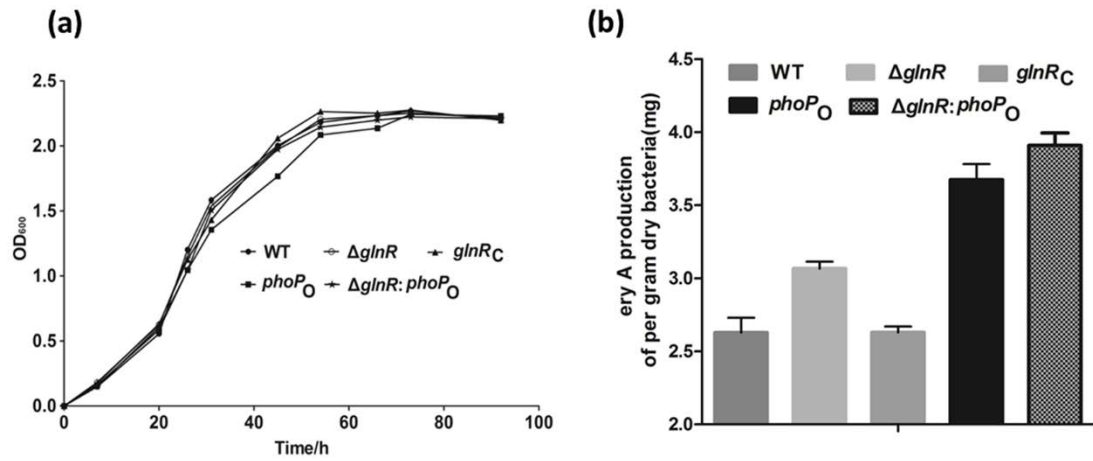

**Figure S5.** Cell growth (a) and erythromycin product (b) of *S. erythraea* wild type (WT), *glnR*-deleted mutant ( $\Delta glnR$ ), *glnR* complementary strain ( $glnR_C$ ), *phoP*-overexpressed strain ( $phoP_O$ ), and *phoP*-overexpressed  $\Delta glnR$  strain ( $\Delta glnR: phoP_O$ ). The growth was determined with OD<sub>600</sub>. The erythromycin A was determined by HPLC.
